# Supplementary material for: Conservation, Compensation, and Evolution of N-Linked Glycans in the HIV-1 Group M Subtypes and Circulating Recombinant Forms
Source: PubMed Central journal article supplement (PMC3765798; doi:10.5402/2012/823605), 2012-12-19
Supplement: 823605.f1.pdf [file 823605.f1.pdf]

**Supplementary Table 1:** All of the highly dependent glycosylated pairs identified for each of the subtypes/CRFs studied. Such pairs were identified as glycosylated together in greater than 90% of sequences representing that subtype/CRF. Percentages of sequences in which the pair was identified in are in brackets.

| A              | B              | C              | D               | AE             | AG              |
|----------------|----------------|----------------|-----------------|----------------|-----------------|
| 88 & 156 (94)  | 88 & 156 (93)  | 88 & 156 (94)  | 88 & 241 (91)   | 88 & 156 (95)  | 88 & 156 (96)   |
| 88 & 160 (94)  | 88 & 197 (94)  | 88 & 160 (92)  | 88 & 262 (95)   | 88 & 160 (91)  | 88 & 160 (98)   |
| 88 & 197 (95)  | 88 & 241 (94)  | 88 & 197 (96)  | 88 & 448 (95)   | 88 & 197 (95)  | 88 & 197 (98)   |
| 88 & 241 (93)  | 88 & 262 (98)  | 88 & 241 (95)  | 197 & 262 (93)  | 88 & 241 (93)  | 88 & 241 (100)  |
| 88 & 262 (97)  | 88 & 276 (95)  | 88 & 262 (97)  | 197 & 448 (93)  | 88 & 262 (97)  | 88 & 262 (100)  |
| 88 & 276 (95)  | 88 & 301 (90)  | 88 & 301 (95)  | 241 & 262 (95)  | 88 & 289 (94)  | 88 & 276 (93)   |
| 88 & 301 (91)  | 88 & 448 (93)  | 156 & 160 (90) | 241 & 448 (95)  | 88 & 334 (93)  | 88 & 301 (90)   |
| 88 & 448 (95)  | 156 & 262 (93) | 156 & 197 (94) | 262 & 276 (91)  | 88 & 386 (96)  | 88 & 448 (95)   |
| 156 & 160 (93) | 156 & 276 (90) | 156 & 241 (93) | 262 & 289 (91)  | 88 & 448 (96)  | 156 & 160 (95)  |
| 156 & 197 (94) | 197 & 241 (90) | 156 & 262 (94) | 262 & 356 (91)  | 156 & 160 (91) | 156 & 197 (95)  |
| 156 & 241 (90) | 197 & 262 (94) | 156 & 301 (92) | 262 & 386 (93)  | 156 & 197 (95) | 156 & 241 (96)  |
| 156 & 262 (94) | 197 & 276 (92) | 160 & 197 (92) | 262 & 448 (100) | 156 & 241 (94) | 156 & 262 (96)  |
| 156 & 276 (93) | 197 & 448 (90) | 160 & 241 (91) | 276 & 448 (91)  | 156 & 262 (97) | 156 & 276 (90)  |
| 156 & 448 (93) | 241 & 262 (95) | 160 & 262 (93) | 289 & 448 (91)  | 156 & 289 (93) | 156 & 448 (92)  |
| 160 & 197 (94) | 241 & 276 (91) | 160 & 301 (91) | 356 & 448 (91)  | 156 & 334 (93) | 160 & 197 (96)  |
| 160 & 241 (90) | 262 & 276 (95) | 197 & 241 (96) | 386 & 448 (93)  | 156 & 386 (95) | 160 & 241 (98)  |
| 160 & 262 (94) | 262 & 301 (90) | 197 & 262 (97) |                 | 156 & 448 (96) | 160 & 262 (98)  |
| 160 & 276 (93) | 262 & 448 (93) | 197 & 301 (95) |                 | 160 & 197 (91) | 160 & 276 (92)  |
| 160 & 448 (93) | 276 & 448 (90) | 241 & 262 (96) |                 | 160 & 241 (91) | 160 & 301 (90)  |
| 197 & 241 (91) |                | 241 & 301 (94) |                 | 160 & 262 (93) | 160 & 448 (93)  |
| 197 & 262 (95) |                | 262 & 276 (90) |                 | 160 & 386 (91) | 197 & 241 (98)  |
| 197 & 276 (94) |                | 262 & 301 (96) |                 | 160 & 448 (92) | 197 & 262 (98)  |
| 197 & 301 (90) |                |                |                 | 197 & 241 (94) | 197 & 276 (92)  |
| 197 & 448 (94) |                |                |                 | 197 & 262 (97) | 197 & 448 (93)  |
| 241 & 262 (93) |                |                |                 | 197 & 289 (93) | 241 & 262 (100) |
| 241 & 276 (91) |                |                |                 | 197 & 334 (93) | 241 & 276 (93)  |
| 241 & 448 (91) |                |                |                 | 197 & 386 (95) | 241 & 301 (90)  |
| 262 & 276 (95) |                |                |                 | 197 & 448 (96) | 241 & 448 (95)  |
| 262 & 301 (91) |                |                |                 | 241 & 262 (95) | 262 & 276 (93)  |
| 262 & 448 (95) |                |                |                 | 241 & 289 (91) | 262 & 301 (90)  |
| 276 & 301 (90) |                |                |                 | 241 & 334 (91) | 262 & 448 (95)  |
| 276 & 448 (94) |                |                |                 | 241 & 386 (93) |                 |
| 301 & 448 (90) |                |                |                 | 241 & 448 (94) |                 |
|                |                |                |                 | 262 & 276 (91) |                 |
|                |                |                |                 | 262 & 289 (95) |                 |
|                |                |                |                 | 262 & 334 (95) |                 |
|                |                |                |                 | 262 & 386 (97) |                 |
|                |                |                |                 | 262 & 448 (98) |                 |
|                |                |                |                 | 289 & 334 (91) |                 |
|                |                |                |                 | 289 & 386 (94) |                 |
|                |                |                |                 | 289 & 448 (94) |                 |
|                |                |                |                 | 334 & 386 (93) |                 |
|                |                |                |                 | 334 & 448 (94) |                 |
|                |                |                |                 | 386 & 448 (96) |                 |
